# Supplementary material for: Lung under attack by COVID-19-induced cytokine storm: pathogenic mechanisms and therapeutic implications
Source: PubMed Central journal article supplement — Ther Adv Respir Dis. 2020 Jun 16;14:1753466620933508. doi: 10.1177/1753466620933508 (PMC7298425; doi:10.1177/1753466620933508), 2020-06-16
Supplement: Reviewer_2_v.1.pdf [file Reviewer_2_v.1.pdf]

Reviewer 2 v.1

Comments to the Author

This work describes in an adequate way the cytokine storm after Sars-CoV-2 infection that leads to COVID-19. In addition, it concludes with the possible available treatments that are being used already to combat other viral diseases and could be tested for COVID-19 as well.

The paper can be published after minor revisions and rewriting of the conclusions section in an appropriate way that discuss the main findings of the work. Also, please replace the term COVID-19 with the term SARS-CoV-2 when you discuss about the virus and not the disease.
